# Supplementary material for: Chemical Profiling, Bioactivity Evaluation and the Discovery of a Novel Biopigment Produced by Penicillium purpurogenum CBS 113139
Source: MDPI journal article supplement (doi:10.3390/molecules27010069), 2021-12-23
Supplement: s1 [file s1]

**Chemical profiling, bioactivity evaluation and the discovery of a novel biopigment produced by *Penicillium purpurogenum* CBS 113139**

Antonis D. Tsailanis<sup>a,‡</sup>, Chrysanthi Pateraki<sup>b,‡</sup>, Kyriazou Mary<sup>b</sup>, Christos Chatzigiannis<sup>a</sup>, Maria Chatziathanasiadou<sup>a</sup>, Nikolaos Parisi<sup>a,c</sup>, Ioanna Mandala<sup>b</sup>, Andreas G. Tzakos<sup>a,c,d,\*</sup>, Apostolis Koutinas<sup>b,\*</sup>

<sup>a</sup> Department of Chemistry, Section of Organic Chemistry and Biochemistry, University of Ioannina, Ioannina, Greece

<sup>b</sup> Department of Food Science and Human Nutrition, Agricultural University of Athens, Iera Odos 75, 118 55 Athens, Greece

<sup>c</sup> Department of Chemistry, Biomedical and Analytical Center (BAC), University of Ioannina, Ioannina, Greece

<sup>d</sup> University Research Center of Ioannina (URCI), Institute of Materials Science and Computing, Ioannina, Greece

<sup>‡</sup> Equally contributed as first authors

\* Equally contributed as corresponding authors, E-mails: akoutinas@aui.gr, atzakos@uoi.gr, Tel/Fax: +302105294729

## Contents

|                                                                                                                                                                                                                                                                                                                                                                                                                                                                                                                                                                                                                                                                                                                                                                                                                                 |    |
|---------------------------------------------------------------------------------------------------------------------------------------------------------------------------------------------------------------------------------------------------------------------------------------------------------------------------------------------------------------------------------------------------------------------------------------------------------------------------------------------------------------------------------------------------------------------------------------------------------------------------------------------------------------------------------------------------------------------------------------------------------------------------------------------------------------------------------|----|
| <b>Table S1</b> Fermentation efficiency of biobased pigment production by <i>Penicillium purpurogenum</i> at different initial glucose concentrations (30, 60 and 90 g/L) and different carbon to nitrogen ratio (C:N) of 55:1, 36:1, 27:1, 18:1, 9:1, 5:1 and 2:1. ....                                                                                                                                                                                                                                                                                                                                                                                                                                                                                                                                                        | 3  |
| <b>Table S2</b> Color coordinates for CIELAB color space of pigment stability produced by <i>Penicillium purpurogenum</i> at different pH values ranging from 2.4-11.5 for Pigment Complex A and 1.8-12.3 for Pigment Complex B. Chroma (C*) was calculated according to Equation (1). Hue angle (H) was calculated according to Equation (2). L* indicates lightness read from 0 (black) to 100 (white). The positive a* value indicates the red color while the negative a* value represents the green color. Similarly positive and negative b* values indicate the yellow and the blue colors respectively. Chroma values denote the saturation or purity of color. Hue angle values represent the degree of redness, yellowness, greenness, and blueness; the maximum is at 0, 90, 180 and 270 degrees, respectively. .... | 4  |
| <b>Table S3</b> List of annotated compounds in “Pigment Complex A” and “Pigment Complex B” using High Resolution Mass Spectrometry .....                                                                                                                                                                                                                                                                                                                                                                                                                                                                                                                                                                                                                                                                                        | 5  |
| <b>Table S4.</b> <sup>1</sup> H NMR Assignments of isolated compound of “Pigment Complex B” sample. The abbreviations are s for singlet, d for doublet, t for triplet, m for multiplet and nf stands for not found. ....                                                                                                                                                                                                                                                                                                                                                                                                                                                                                                                                                                                                        | 8  |
| <b>Figure S1</b> Stability of pigments produced by <i>Penicillium purpurogenum</i> at different pH values ranging from 1 to 12. A. Pigments from fermentation medium without ammonium nitrate. B. Pigments from fermentation medium with ammonium nitrate. Absorbance at 400 nm (●). Absorbance at 470 nm (●). Absorbance at 500 nm (●). ....                                                                                                                                                                                                                                                                                                                                                                                                                                                                                   | 10 |
| <b>Figure S2</b> Proposed structures of predominant compound of “Pigment Complex B”. ....                                                                                                                                                                                                                                                                                                                                                                                                                                                                                                                                                                                                                                                                                                                                       | 11 |
| <b>Figure S3</b> HPLC chromatogram of Pigment Complex B. ....                                                                                                                                                                                                                                                                                                                                                                                                                                                                                                                                                                                                                                                                                                                                                                   | 11 |
| <b>FigS4.</b> Structure and <sup>1</sup> H NMR spectra of the isolated major pigment in Pigment Complex B sample. ....                                                                                                                                                                                                                                                                                                                                                                                                                                                                                                                                                                                                                                                                                                          | 12 |

**Table S1** Fermentation efficiency of biobased pigment production by *Penicillium purpurogenum* at different initial glucose concentrations (30, 60 and 90 g/L) and different carbon to nitrogen ratio (C:N) of 55:1, 36:1, 27:1, 18:1, 9:1, 5:1 and 2:1.

|                               | Final<br>fermentation<br>time (h) | AU<br>(400<br>nm) | AU<br>(470<br>nm) | AU<br>(500<br>nm) | $\mu_{\max}$<br>(h <sup>-1</sup> ) | X <sub>max</sub><br>(g/L) | Y<br>X/S | Specific<br>productivity<br>(AU/gDCW/h) | Glycerol<br>(g/L) |
|-------------------------------|-----------------------------------|-------------------|-------------------|-------------------|------------------------------------|---------------------------|----------|-----------------------------------------|-------------------|
| Initial glucose concentration |                                   |                   |                   |                   |                                    |                           |          |                                         |                   |
| 30                            | 138                               | 3.6               | 3.6               | 3.7               | 1.73                               | 7.3                       | 0.22     | 0.0042                                  | 1.2               |
| 60                            | 138                               | 3.2               | 2.9               | 3.1               | 2.46                               | 13.7                      | 0.20     | 0.0017                                  | 8.94              |
| 90                            | 180                               | 2.6               | 2.4               | 2.4               | 2.68                               | 21.1                      | 0.24     | 0.0007                                  | 21.1              |
| C:N ratio                     |                                   |                   |                   |                   |                                    |                           |          |                                         |                   |
| 2:1                           | 72                                | 0.83              | 0.43              | 0.37              | 3.21                               | 29.14                     | 0.39     | 0.0004                                  | 2.1               |
| 5:1                           | 72                                | 0.40              | 0.43              | 0.50              | 3.12                               | 27.13                     | 0.36     | 0.0002                                  | 3.23              |
| 9:1                           | 72                                | 2.4               | 2.4               | 2.5               | 3.05                               | 25.00                     | 0.34     | 0.0014                                  | 3.84              |
| 18:1                          | 72                                | 3.3               | 3.5               | 3.8               | 3.11                               | 29.75                     | 0.54     | 0.0016                                  | 4.59              |
| 27:1                          | 122                               | 3.4               | 4.1               | 3.9               | 2.77                               | 20.25                     | 0.27     | 0.0014                                  | 3.65              |
| 36:1                          | 143                               | 4.3               | 4.1               | 4.5               | 2.66                               | 23.25                     | 0.33     | 0.0013                                  | 4.13              |
| 55:1                          | 138                               | 3.61              | 3.58              | 3.70              | 2.46                               | 13.70                     | 0.20     | 0.0019                                  | 3.78              |

**Table S2** Color coordinates for CIELAB color space of pigment stability produced by *Penicillium purpurogenum* at different pH values ranging from 2.4-11.5 for Pigment Complex A and 1.8-12.3 for Pigment Complex B. Chroma (C\*) was calculated according to Equation (1). Hue angle (H) was calculated according to Equation (2). L\* indicates lightness read from 0 (black) to 100 (white). The positive a\* value indicates the red color while the negative a\* value represents the green color. Similarly positive and negative b\* values indicate the yellow and the blue colors respectively. Chroma values denote the saturation or purity of color. Hue angle values represent the degree of redness, yellowness, greenness, and blueness; the maximum is at 0, 90, 180 and 270 degrees, respectively.

| Pigments                                           | pH   | L    | a     | b     | C     | h      |
|----------------------------------------------------|------|------|-------|-------|-------|--------|
| Pigment Complex A<br>(without ammonium<br>nitrate) | 2.4  | 9.08 | 13.69 | 7.59  | 15.65 | 29.00  |
|                                                    | 2.9  | 8.45 | 14.08 | 6.71  | 15.60 | 25.48  |
|                                                    | 4.1  | 4.96 | 8.38  | 0.44  | 8.39  | 3.01   |
|                                                    | 6.8  | 2.85 | 1.69  | -1.59 | 2.32  | 316.75 |
|                                                    | 10.8 | 2.51 | 0.94  | -1.57 | 1.83  | 300.91 |
|                                                    | 11.5 | 2.63 | 0.88  | -1.75 | 1.96  | 296.70 |
| Pigment Complex B<br>(with ammonium<br>nitrate)    | 1.8  | 6.30 | 9.84  | 3.03  | 10.30 | 17.12  |
|                                                    | 2.2  | 5.95 | 9.83  | 2.57  | 10.16 | 14.65  |
|                                                    | 2.7  | 6.1  | 9.59  | 2.48  | 9.91  | 14.50  |
|                                                    | 3.3  | 5.7  | 8.69  | 2.04  | 8.93  | 13.21  |
|                                                    | 4    | 5.48 | 8.04  | 1.7   | 8.22  | 11.94  |

|      |      |      |       |      |        |
|------|------|------|-------|------|--------|
| 5.6  | 4.48 | 6.86 | 1.17  | 6.96 | 9.68   |
| 8.5  | 3.76 | 5    | 0.44  | 5.02 | 5.03   |
| 9.5  | 3.95 | 4.34 | 0.15  | 4.34 | 1.98   |
| 12.3 | 4    | 4.04 | -0.26 | 4.05 | 356.32 |

**Table S3** List of annotated compounds in “Pigment Complex A” and “Pigment Complex B” using High Resolution Mass Spectrometry

| Compound Name                                 | Retention time (min) | Pigment Complex A (Intensity) | Pigment Complex B (Intensity) |
|-----------------------------------------------|----------------------|-------------------------------|-------------------------------|
| 13Z-Docosenamide                              | 15.2                 | 1607                          | 8355                          |
| 17.18-dehydro-clavulone I                     | 14.6                 | 4409                          | 0                             |
| 2-(2-Butoxyethoxy)ethanol                     | 8.4                  | 7381                          | 7931                          |
| 2-(2-Butoxyethoxy)ethyl acetate               | 10.8                 | 2300                          | 2541                          |
| 2.2.4-Trimethyl-1.3-pentanediol diisobutyrate | 16.3                 | 2006                          | 2432                          |
| 2.3-Dimethylaniline                           | 1.4                  | 11841                         | 12685                         |
| 2.4.5-Trihydroxytoluene                       | 6.4                  | 2541                          | 1817                          |
| 2-[2-(2-Butoxyethoxy)ethoxy]ethanol           | 9.7                  | 14003                         | 15565                         |
| 2-Hydroxy-2-methylbutanedioic acid            | 1.4                  | 2690                          | 3812                          |
| 2-Isopropylmalic acid                         | 6.3                  | 13229                         | 13070                         |
| 2-Methyl-1-Pyrroline                          | 3.6                  | 8542                          | 7976                          |

|                                   |            |          |               |
|-----------------------------------|------------|----------|---------------|
| 2-Methylimidazole                 | 20.1       | 6642     | 6729          |
| 3-Hexynoic acid                   | 6.0        | 24896    | 38061         |
| 4-Methylcatechol                  | 5.1        | 1279     | 1890          |
| 4-Nitrophenol                     | 9.0        | 2124     | 1073          |
| 5-keto-n-caproic acid             | 6.0        | 1276     | 5314          |
| 6-Hydroxyhexan-6-olide            | 3.4        | 8242     | 14453         |
| 7-Methoxychromone                 | 12.1       | 12096    | 14736         |
| Azelaic acid                      | 8.5        | 6869     | 7236          |
| Betaine                           | 1.2        | 80864    | 131672        |
| beta-Sitostenone                  | 20.2       | 2851     | 0             |
| Byssochlamic Acid                 | 13.6       | 769      | 8526          |
| Carboxyibuprofen                  | 9.1        | 23474    | 2382          |
| Choline                           | 1.1        | 6574     | 16160         |
| Citric acid                       | 1.4        | 622997   | 626418        |
| Cyanoacetic acid                  | 18.8       | 4327     | 4240          |
| D-(+)-Malic acid                  | 1.3        | 579      | 3758          |
| D-Lysine                          | 1.0        | 0        | 3764          |
| Ethylmalonic acid                 | 5.2        | 710      | 2250          |
| Ethylparaben                      | 13.3       | 3482     | 1895          |
| <b>gamma-carboxyglutamic acid</b> | <b>1.2</b> | <b>0</b> | <b>249459</b> |
| Hexamethylphosphoramide           | 7.7        | 48225    | 229           |
| Homogentisic acid                 | 5.1        | 2094     | 3559          |
| Hydroxyphenyllactic acid          | 6.0        | 3844     | 2955          |
| L-Alloisoleucine                  | 2.8        | 169      | 6702          |

|                                                              |             |               |             |
|--------------------------------------------------------------|-------------|---------------|-------------|
| L-Arabitol                                                   | 1.2         | 12547         | 6235        |
| L-Aspartic Acid                                              | 1.1         | 97            | 11078       |
| Lauroyl diethanolamide                                       | 13.3        | 2381          | 1307        |
| L-Carnitine                                                  | 1.2         | 5216          | 15571       |
| L-Glutamic acid                                              | 1.1         | 0             | 64558       |
| L-Histidine                                                  | 1.0         | 0             | 3418        |
| L-Iditol                                                     | 1.1         | 64994         | 70025       |
| L-Phenylalanine                                              | 5.0         | 97            | 6173        |
| L-Tryptophan                                                 | 2.8         | 0             | 8258        |
| L-Tyrosine                                                   | 2.8         | 0             | 6537        |
| Mesaconic acid                                               | 1.4         | 79558         | 84044       |
| Mevaldate                                                    | 1.2         | 10666         | 0           |
| <b><i>Monascorubrin</i></b>                                  | <b>16.0</b> | <b>83693</b>  | <b>794</b>  |
| N-(2-Phenylethyl)-acetamide                                  | 8.5         | 247           | 8122        |
| N-Acetyltyramine                                             | 6.6         | 121           | 4669        |
| N-Butylbenzenesulfonamide                                    | 11.6        | 5656          | 7499        |
| <b><i>N-threonyl-rubropunctamin or Acid form of PP-R</i></b> | <b>11.5</b> | <b>161531</b> | <b>5353</b> |
| N-Acetyl-L-lysine                                            | 1.4         | 0             | 9781        |
| Phenylpyruvic acid                                           | 7.2         | 1309          | 3718        |
| Pinolenic Acid                                               | 14.6        | 7957          | 0           |
| <b><i>PP-O</i></b>                                           | <b>14.0</b> | <b>97367</b>  | <b>833</b>  |
| <b><i>N-GABA-PP-V</i></b>                                    | <b>11.8</b> | <b>200199</b> | <b>0</b>    |
| Protocatechuic acid                                          | 6.8         | 1010          | 9867        |
| Pyruvate                                                     | 1.4         | 0             | 9454        |

|                                |      |        |        |
|--------------------------------|------|--------|--------|
| Suberic acid                   | 7.8  | 3408   | 3618   |
| Triethylamine                  | 1.4  | 206874 | 183735 |
| <i>N</i> -carboxyglutaryl-PP-V | 11.2 | 0      | 52498  |
| Uridine                        | 1.4  | 1333   | 17539  |

**Table S4.** <sup>1</sup>H NMR Assignments of isolated compound of “Pigment Complex B” sample. The abbreviations are s for singlet, d for doublet, t for triplet, m for multiplet and nf stands for not found.

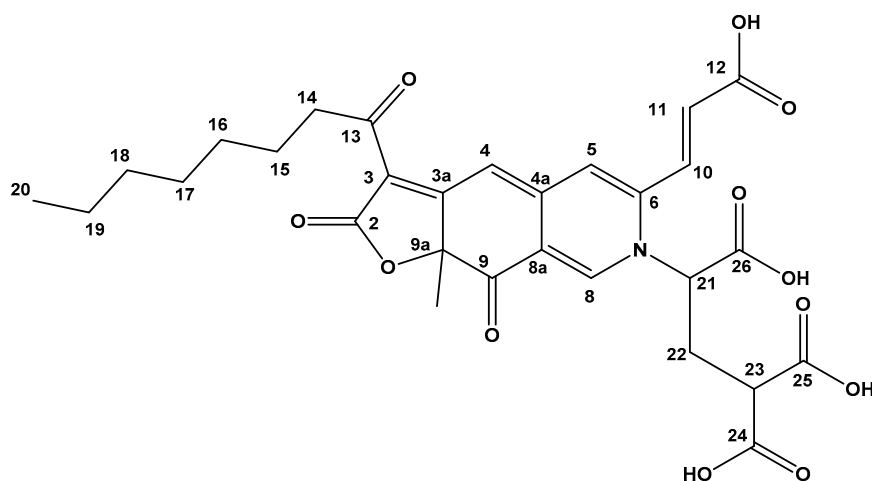

| Atom No | $\delta_H$ | Multiplicity, J <sub>c</sub> | Integral |
|---------|------------|------------------------------|----------|
| 2       | -          | -                            | -        |
| 3       | -          | -                            | -        |
| 3a      | -          | -                            | -        |
| 4       | 5.75       | (s)                          | 1H       |
| 4a      | -          | -                            | -        |
| 5       | 7.19       | (s)                          | 1H       |
| 6       | -          | -                            | -        |



|                    |          |              |    |
|--------------------|----------|--------------|----|
| 8                  | 8.27     | (s)          | 1H |
| 8a                 | -        | -            | -  |
| 9                  | -        | -            | -  |
| 9a                 | -        | -            | -  |
| 9a-CH <sub>3</sub> | 1.64     | (s)          | 3H |
| 10                 | 6.71     | (d), 8.047Hz | 1H |
| 11                 | 7.03     | (d), 8.072Hz | 1H |
| 12                 | -        | -            | -  |
| 13                 | -        | -            | -  |
| 14                 | 2.65     | (m)          | 2H |
| 15                 | 1.63     | (m)          | 2H |
| 16                 | 1.63     | (m)          | 2H |
| 17                 | 1.55     | (m)          | 2H |
| 18                 | 0.9-0.95 | (m)          | 2H |
| 19                 | 0.9-0.95 | (m)          | 2H |
| 20                 | 0.89     | (t), 7.23Hz  | 3H |
| 21                 | nf       | -            | -  |
| 22                 | 2.65     | (m)          | 2H |
| 23                 | nf       | -            | -  |
| 24                 | -        | -            | -  |
| 25                 | -        | -            | -  |
| 26                 | -        | -            | -  |

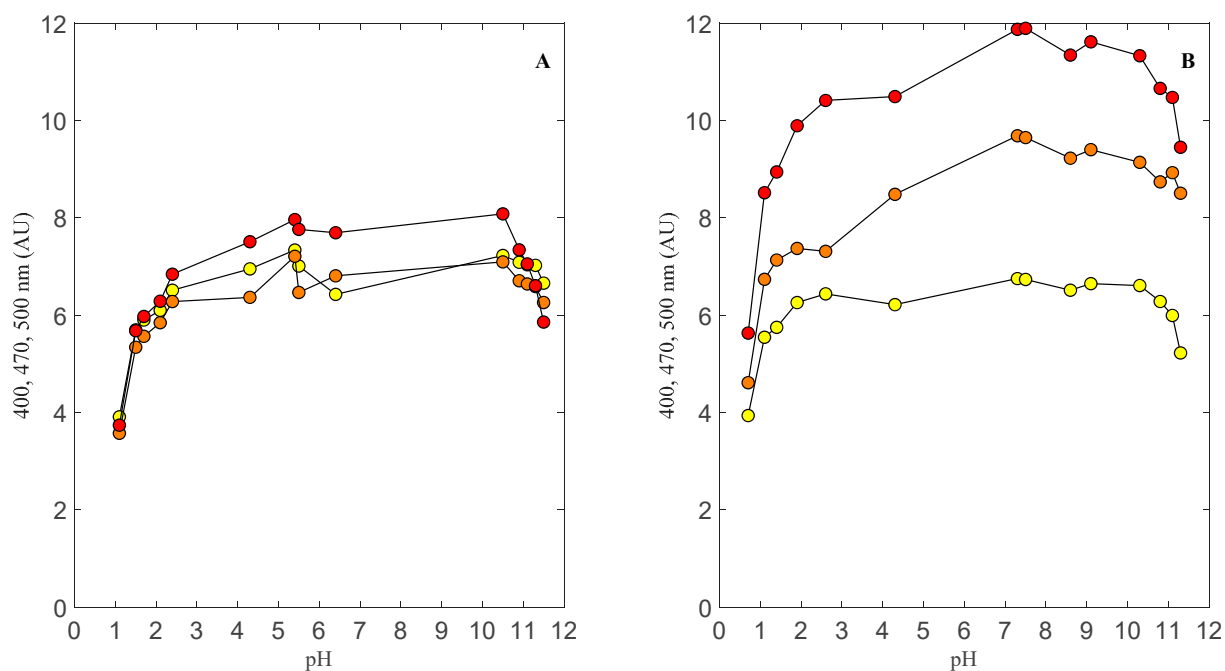

**Figure S1** Stability of pigments produced by *Penicillium purpurogenum* at different pH values ranging from 1 to 12. A. Pigments from fermentation medium without ammonium nitrate. B. Pigments from fermentation medium with ammonium nitrate. Absorbance at 400 nm (●). Absorbance at 470 nm (●). Absorbance at 500 nm (●).

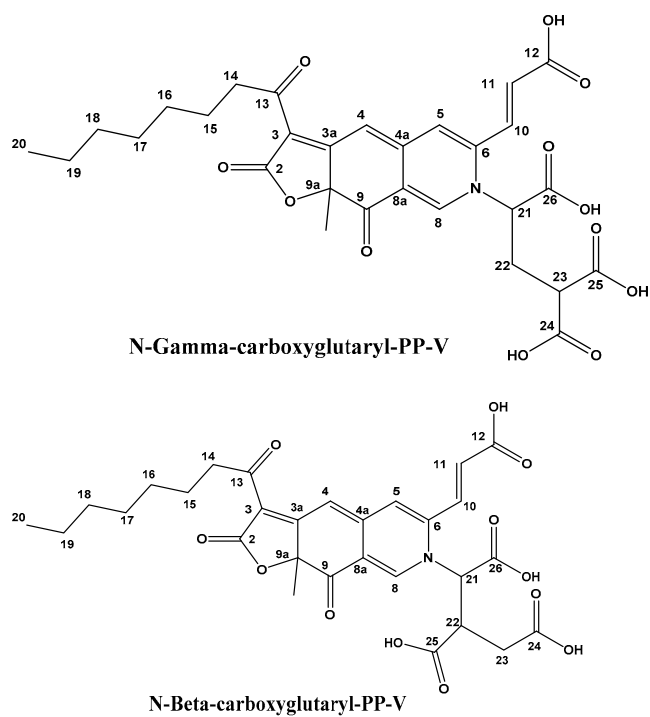

**Figure S2** Proposed structures of predominant compound of “Pigment Complex B”.

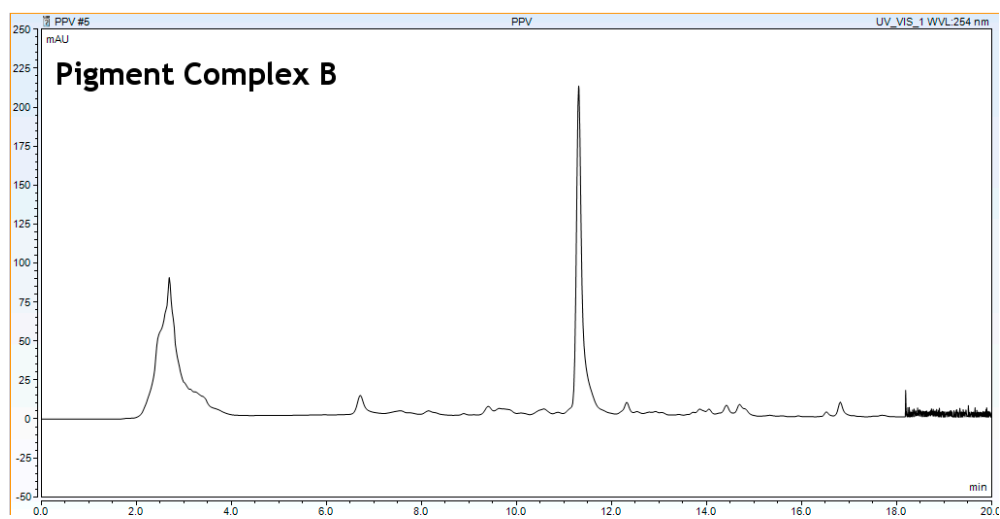

**Figure S3** HPLC chromatogram of Pigment Complex B

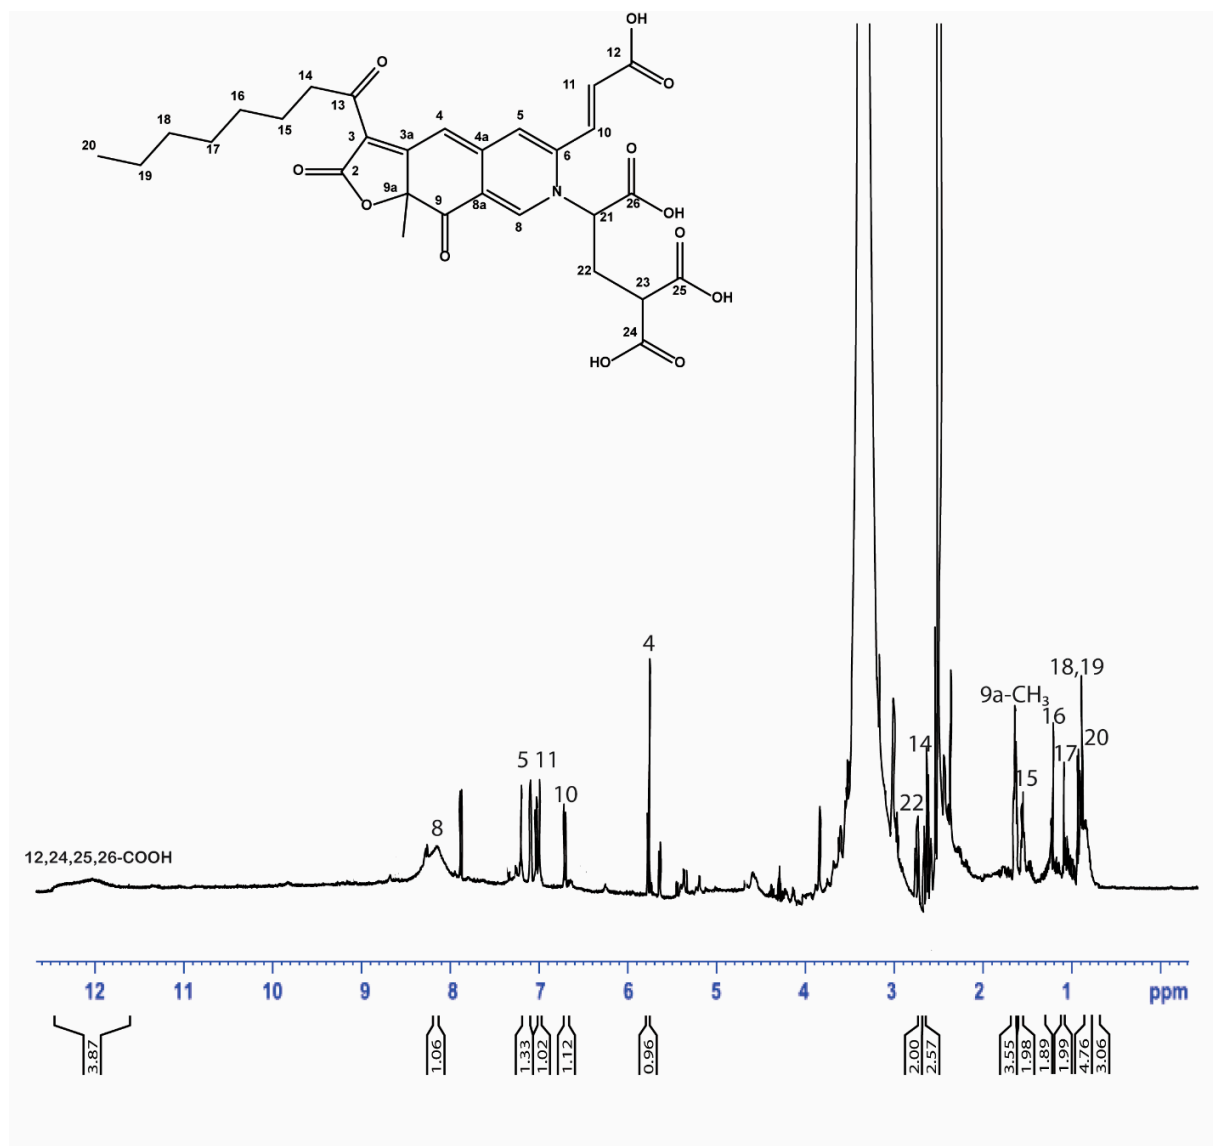

**Figure S4.** Structure and  $^1\text{H}$ NMR spectra of the isolated major pigment in Pigment Complex B sample.
